# Supplementary material for: Photo-catalytic hydrogen production over Au/g-C3N4: effect of gold particle dispersion and morphology
Source: Royal Society of Chemistry journal article supplement (doi:10.1039/c9cp02241d), 2019-01-01
Supplement: c9cp02241d1.pdf [file c9cp02241d1.pdf]

## 1. Supplementary information

### Photo-catalytic hydrogen production over Au/g-C<sub>3</sub>N<sub>4</sub>. Effect of gold particles dispersion, and morphology.

M. Caux <sup>a</sup>, H. Menard <sup>b</sup>, Y. M AlSalik <sup>c</sup>, J. TS Irvine\* <sup>a</sup>, and H. Idriss\* <sup>c</sup>

<sup>a</sup> School of Chemistry, University of St Andrews, St Andrews, United Kingdom

<sup>b</sup> Leverhulme Research Centre for Forensic Science, University of Dundee, Dundee, United Kingdom

<sup>c</sup> SABIC-Corporate Research and Development (CRD), KAUST, Thuwal, Saudi Arabia

Corresponding authors email address: [jtsi@st-andrews.ac.uk](mailto:jtsi@st-andrews.ac.uk) and [idriss@sabir.com](mailto:idriss@sabir.com)

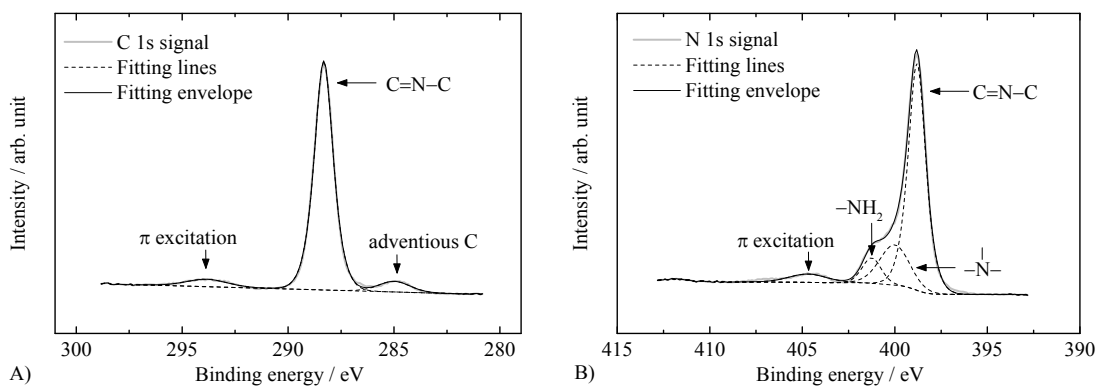

**Figure SI 1: XP spectra of 2.1 wt% Au/g-C<sub>3</sub>N<sub>4</sub> carbon and nitrogen 1s regions**

XP spectra of 2.1 wt% Au/g-C<sub>3</sub>N<sub>4</sub>: A) C 1s and B) N 1s regions.

**Table SI 1: Impact of thermal treatment on gold mean particle size**

Mean particle sizes extracted from TEM micrographs of 2.1 wt% Au/g-C<sub>3</sub>N<sub>4</sub> (4-hours) before and after thermal treatment in different atmospheres.

| Thermal treatment              | Mean particle size / nm | Standard deviation / nm |
|--------------------------------|-------------------------|-------------------------|
| None                           | 1.8                     | 0.6                     |
| Static air                     | 5.8                     | 2.9                     |
| 5 vol% H <sub>2</sub> in argon | 4.8                     | 2.0                     |

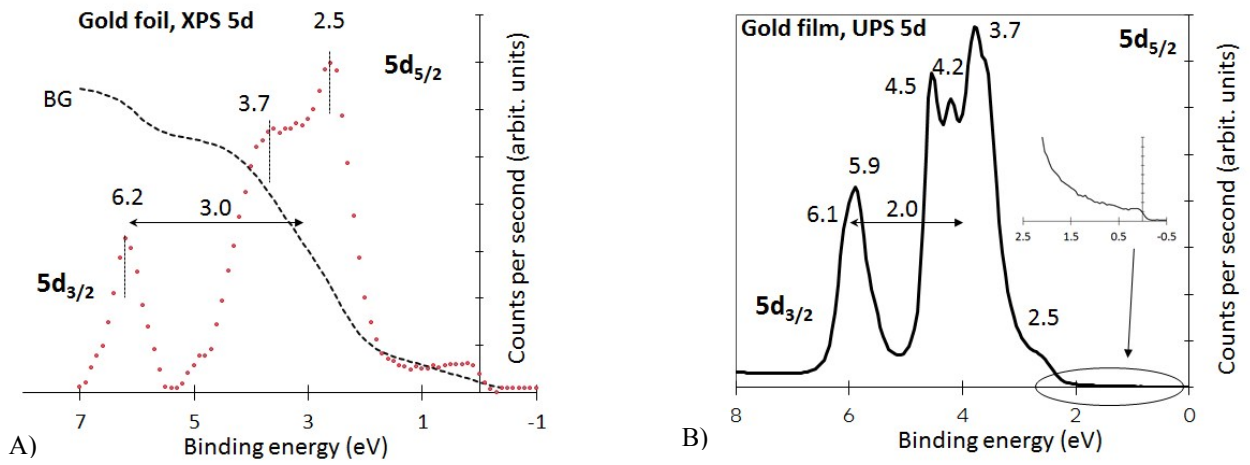

**Figure SI 2: XPS and UPS measurements of Au foil**

A) Valence band XPS of Au foil; B) Valence band UPS of clean (Ar ions sputtered) Au thin film. BG: Shirley background.

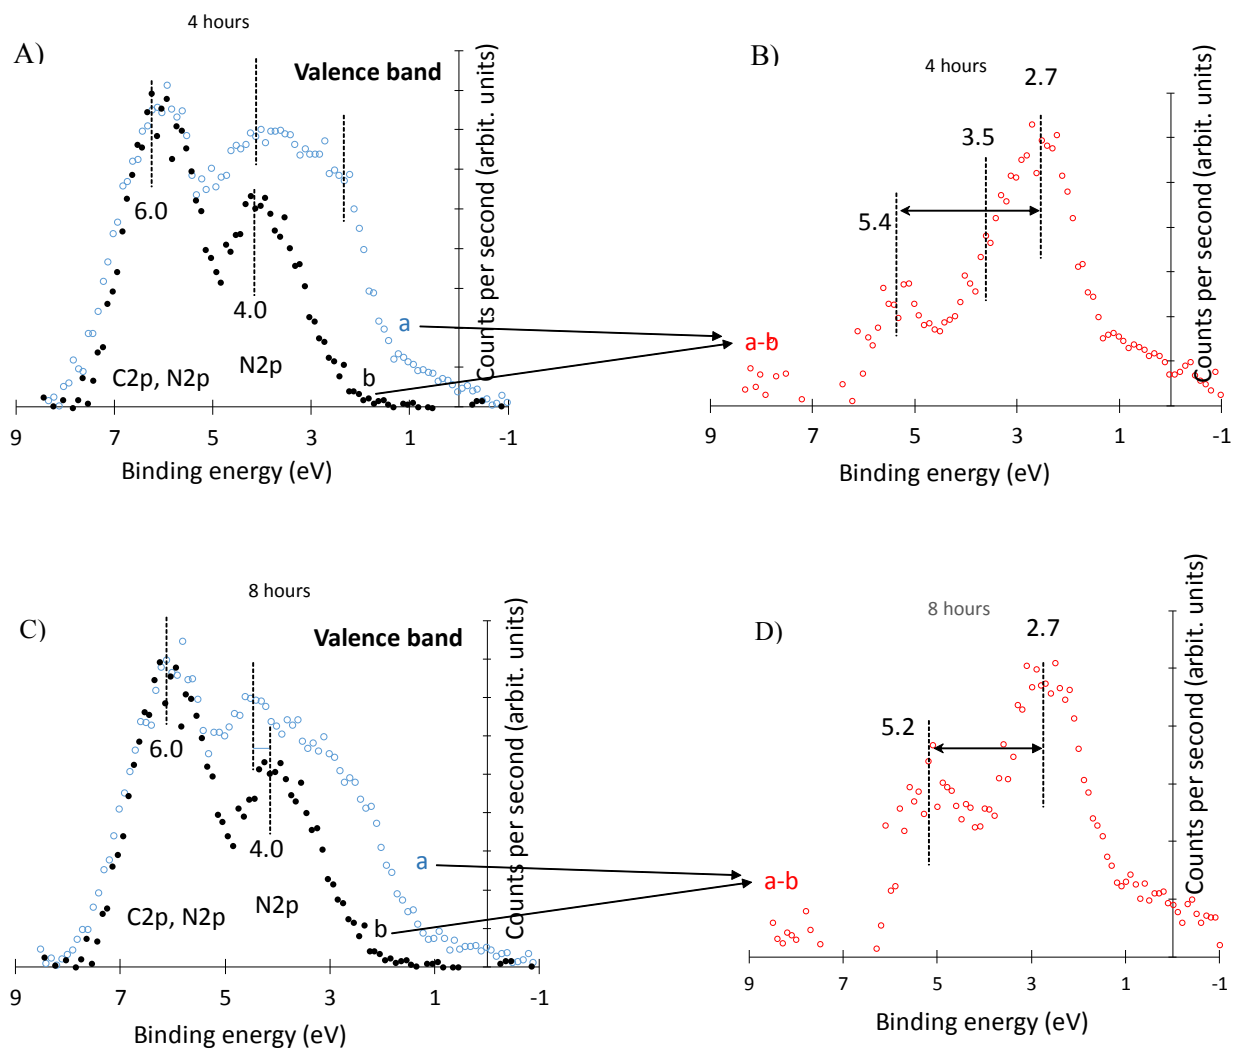

**Figure SI 3: Valence band region of "nominally" 2.1 wt% Au/g-C<sub>3</sub>N<sub>4</sub> catalysts.**

A) Au/g-C<sub>3</sub>N<sub>4</sub> (4-hour deposition time) and g-C<sub>3</sub>N<sub>4</sub>, B) subtracted spectra of A) upon normalization at 6 eV, C) Au/g-C<sub>3</sub>N<sub>4</sub> (8-hour deposition time) and g-C<sub>3</sub>N<sub>4</sub>, D) subtracted spectra of C) upon normalization at 6 eV.

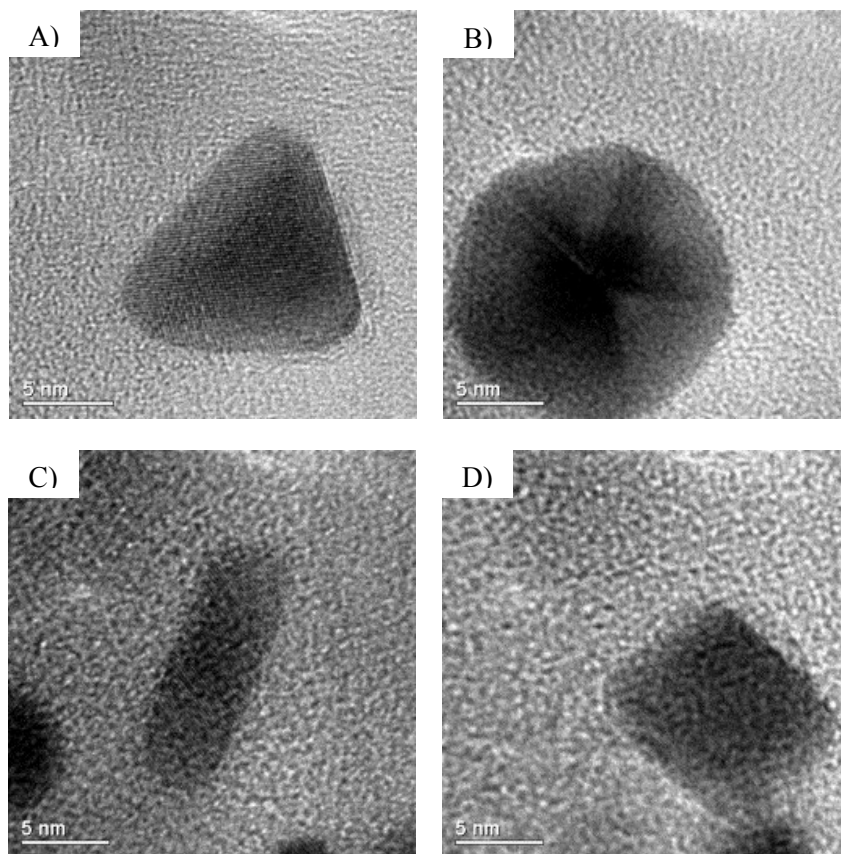

**Figure SI 4: TEM micrographs of 2.1 wt% Au/g-C<sub>3</sub>N<sub>4</sub> after thermal treatment in 5 vol% H<sub>2</sub> in argon**

TEM micrographs of reduced 2.1 wt% Au/g-C<sub>3</sub>N<sub>4</sub> presenting various morphologies such as A) triangular nanoplate, B) polyhedron, C) rod and D) cube.

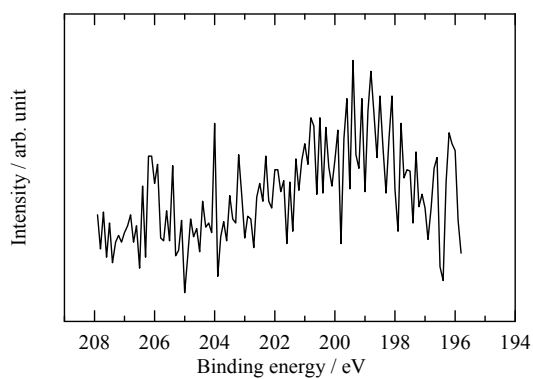

**Figure SI 5: XPS spectra of chlorine 2p region for as-prepared 2.1 wt% Au/g-C<sub>3</sub>N<sub>4</sub>**

**Table SI 2: Impact of urea concentration on gold mean particle size and gold coverage**

Mean particle sizes extracted from TEM micrographs of 2.1 wt% Au/g-C<sub>3</sub>N<sub>4</sub> (4-hours) prepared with various urea concentrations and reduced in 5 vol% H<sub>2</sub> in argon previous to characterisation. Atomic percentage of gold extracted from XPS measurements.

| Urea concentration / M | [Urea]:[Au] | Mean particle size / nm | Standard deviation / nm | Au at% XPS Au4f | Particle density 100nm <sup>2</sup> | <sup>197</sup> Au area % TEM |
|------------------------|-------------|-------------------------|-------------------------|-----------------|-------------------------------------|------------------------------|
| 0                      | 0           | 3.5                     | 1.7                     | 0.3             | 0.7                                 | 11                           |
| 0.25                   | 230         | 5.4                     | 1.9                     | 2.6             | 2.4                                 | 58                           |
| 0.42                   | 400         | 4.8                     | 2.0                     | 0.6             | 1.0                                 | 16                           |
| 0.85                   | 830         | 5.8                     | 3.1                     | 1.3             | 1.2                                 | 31                           |

a: (number of Au particles x area of the mean particle size / total area) x 100, from TEM images.
